# Supplementary material for: Comparison of Venous Thromboembolism after Total Artificial Joint Replacement between Musculoskeletal Tumors and Osteoarthritis of the Knee by a Single Surgeon
Source: PLoS One. 2016 Jun 28;11(6):e0158215. doi: 10.1371/journal.pone.0158215 (PMC4924844; doi:10.1371/journal.pone.0158215)
Supplement: S1 Data — (XLSX) [file pone.0158215.s001.xlsx]

## Sheet: Sheet1
Gender	Age	BMI	Benign/Malignant	Bone/Soft tissue	Primary/Metastasis	Pathological fracture	Loaction		Chemotherapy	Radiotherapy
Female	13	26.8	Benign	Bone	Primary	No	Proximal tibia	Positive	No	No
Female	18	15.6	Malignant	Soft tissue	Primary	Yes	Distal femur	Negative	Yes	Yes
Male	26	16.9	Benign	Bone	Primary	No	Distal femur	Negative	No	No
Female	34	16.1	Malignant	Soft tissue	Primary	No	Proximal tibia	Positive	Yes	Yes
Male	55	17.9	Benign	Soft tissue	Primary	No	Distal femur	Negative	No	No
Female	18	21.3	Malignant	Bone	Primary	No	Proximal tibia	Negative	Yes	Yes
Female	25	24.1	Benign	Soft tissue	Primary	Yes	Distal femur	Negative	No	No
Male	24	18.4	Malignant	Soft tissue	Primary	No	Proximal tibia	Positive	Yes	No
Female	34	18.2	Malignant	Bone	Primary	No	Distal femur	Negative	Yes	No
Female	15	20.1	Malignant	Soft tissue	Primary	No	Distal femur	Negative	Yes	No
Male	46	19.1	Benign	Bone	Primary	No	Proximal tibia	Negative	No	No
Male	37	15.3	Malignant	Bone	Primary	No	Distal femur	Positive	Yes	Yes
Male	25	17.4	Malignant	Bone	Primary	No	Distal femur	Negative	Yes	Yes
Female	34	15.2	Benign	Bone	Primary	No	Proximal tibia	Negative	No	No
Male	27	16.5	Malignant	Bone	Primary	No	Distal femur	Negative	Yes	No
Male	26	21.9	Malignant	Soft tissue	Primary	No	Distal femur	Positive	Yes	No
Male	29	20.7	Benign	Soft tissue	Primary	No	Proximal tibia	Negative	No	No
Female	37	17.5	Malignant	Bone	Primary	No	Distal femur	Negative	Yes	No
Male	56	18.8	Benign	Soft tissue	Primary	Yes	Distal femur	Positive	No	No
Male	17	27.2	Malignant	Soft tissue	Primary	No	Distal femur	Negative	Yes	Yes
Female	27	20.1	Malignant	Bone	Primary	No	Proximal tibia	Negative	Yes	Yes
Female	36	16.7	Benign	Soft tissue	Primary	No	Distal femur	Negative	No	No
Female	47	15.3	Malignant	Soft tissue	Primary	No	Distal femur	Positive	Yes	No
Female	53	16.2	Malignant	Bone	Primary	No	Distal femur	Negative	Yes	No
Female	25	16.3	Benign	Soft tissue	Primary	No	Proximal tibia	Negative	No	No
Female	58	18.2	Malignant	Soft tissue	Primary	No	Distal femur	Positive	Yes	No
Female	21	18.3	Malignant	Bone	Primary	No	Proximal tibia	Negative	Yes	Yes
Male	15	17.4	Benign	Soft tissue	Primary	No	Distal femur	Negative	No	No
Female	36	27.9	Malignant	Bone	Primary	No	Distal femur	Positive	Yes	Yes
Female	47	15.3	Malignant	Bone	Metastasis	No	Proximal tibia	Negative	Yes	No
Male	53	26.4	Benign	Soft tissue	Primary	Yes	Distal femur	Negative	No	No
Male	44	20.1	Benign	Soft tissue	Primary	No	Distal femur	Positive	No	No
Male	34	23	Malignant	Soft tissue	Primary	No	Distal femur	Negative	Yes	Yes
Male	32	18.2	Benign	Bone	Primary	No	Proximal tibia	Negative	No	No
Female	36	17.6	Malignant	Soft tissue	Primary	No	Distal femur	Positive	Yes	Yes
Male	28	16.7	Benign	Soft tissue	Primary	No	Distal femur	Negative	No	No
Male	29	18	Malignant	Soft tissue	Primary	No	Proximal tibia	Negative	Yes	Yes
Female	30	19.7	Malignant	Soft tissue	Primary	No	Distal femur	Positive	Yes	Yes
Male	34	16.3	Benign	Soft tissue	Primary	No	Distal femur	Negative	No	No
Male	32	17.2	Malignant	Soft tissue	Primary	No	Proximal tibia	Negative	Yes	Yes
Female	56	18.4	Malignant	Soft tissue	Primary	No	Distal femur	Positive	No	No
Female	18	18.3	Benign	Soft tissue	Metastasis	No	Distal femur	Negative	No	No
Female	57	18.3	Malignant	Soft tissue	Primary	No	Distal femur	Negative	Yes	Yes
Female	43	25.2	Malignant	Bone	Primary	No	Proximal tibia	Negative	Yes	No
Female	47	17.9	Benign	Soft tissue	Primary	No	Distal femur	Positive	No	No
Female	52	21.4	Malignant	Soft tissue	Primary	No	Distal femur	Negative	Yes	No
Female	34	24.1	Malignant	Soft tissue	Primary	No	Distal femur	Negative	Yes	No
Male	58	22.1	Benign	Bone	Primary	No	Proximal tibia	Negative	No	No
Female	34	23.5	Malignant	Soft tissue	Primary	No	Distal femur	Positive	Yes	Yes
Female	39	14.5	Malignant	Soft tissue	Primary	No	Distal femur	Negative	Yes	No
Male	51	15.2	Benign	Bone	Primary	No	Distal femur	Negative	No	No
Male	15	15.3	Malignant	Soft tissue	Primary	Yes	Distal femur	Negative	Yes	Yes
Male	17	16.3	Malignant	Soft tissue	Primary	No	Proximal tibia	Positive	Yes	Yes
Female	26	17.3	Benign	Soft tissue	Primary	No	Distal femur	Negative	No	No
Male	47	16.9	Malignant	Bone	Primary	No	Distal femur	Negative	Yes	Yes
Male	32	16.6	Malignant	Soft tissue	Primary	No	Distal femur	Negative	Yes	Yes
Female	47	19.5	Benign	Soft tissue	Metastasis	No	Proximal tibia	Positive	No	No
Male	54	18.3	Malignant	Bone	Primary	No	Distal femur	Negative	Yes	No
Male	26	25.6	Malignant	Soft tissue	Primary	No	Proximal tibia	Negative	No	No
Male	29	16.4	Benign	Soft tissue	Primary	No	Distal femur	Negative	No	No
Female	41	18.9	Malignant	Soft tissue	Primary	No	Distal femur	Positive	Yes	No
Female	29	17.6	Benign	Bone	Primary	No	Distal femur	Negative	No	No
Female	56	16.4	Malignant	Soft tissue	Primary	No	Proximal tibia	Negative	Yes	Yes
Female	43	16.7	Benign	Soft tissue	Primary	No	Distal femur	Negative	No	No
Female	23	18.5	Benign	Bone	Primary	No	Distal femur	Positive	No	No
Male	26	18.8	Benign	Soft tissue	Primary	No	Distal femur	Negative	No	No
Female	28	18.2	Malignant	Soft tissue	Primary	No	Proximal tibia	Negative	Yes	No
Female	43	18	Malignant	Soft tissue	Primary	No	Distal femur	Negative	Yes	Yes
Female	11	18.4	Benign	Soft tissue	Metastasis	No	Distal femur	Negative	No	No
Female	19	19.1	Malignant	Bone	Primary	No	Distal femur	Positive	Yes	Yes
Male	15	16.8	Malignant	Soft tissue	Primary	No	Distal femur	Negative	Yes	Yes
Male	9	16.7	Benign	Soft tissue	Primary	No	Proximal tibia	Negative	No	No
Female	14	17.1	Malignant	Soft tissue	Primary	Yes	Distal femur	Positive	Yes	Yes
Male	16	18.3	Benign	Bone	Primary	No	Distal femur	Negative	No	No
Male	35	26.2	Benign	Soft tissue	Metastasis	No	Distal femur	Negative	No	No
Male	28	17.7	Benign	Soft tissue	Primary	No	Distal femur	Positive	No	No
Female	36	18.5	Malignant	Soft tissue	Primary	No	Distal femur	Negative	No	No
Male	27	15.2	Malignant	Bone	Primary	No	Proximal tibia	Positive	Yes	Yes
Male	33	18.2	Benign	Soft tissue	Primary	No	Distal femur	Negative	No	No
Male	23	17.4	Benign	Soft tissue	Primary	No	Distal femur	Negative	No	No
Female	26	18.2	Malignant	Soft tissue	Metastasis	No	Distal femur	Negative	Yes	Yes
Female	32	19	Malignant	Bone	Primary	No	Proximal tibia	Positive	Yes	No
Male	48	21.1	Benign	Soft tissue	Primary	No	Distal femur	Negative	No	No
Female	54	22.9	Malignant	Soft tissue	Primary	No	Distal femur	Negative	Yes	No
Female	22	16.7	Malignant	Soft tissue	Primary	No	Distal femur	Negative	Yes	Yes
Female	27	15.2	Benign	Bone	Primary	No	Distal femur	Positive	No	No
Male	29	23.8	Malignant	Soft tissue	Metastasis	No	Proximal tibia	Negative	Yes	Yes
Female	21	15.2	Malignant	Soft tissue	Primary	No	Distal femur	Negative	Yes	Yes
Female	18	14.5	Benign	Soft tissue	Primary	No	Distal femur	Positive	No	No
Female	23	16.3	Benign	Bone	Primary	No	Distal femur	Negative	No	No
Male	10	18.2	Malignant	Soft tissue	Primary	No	Distal femur	Negative	Yes	Yes
Male	17	17.1	Malignant	Soft tissue	Primary	No	Proximal tibia	Negative	No	No
Female	19	25.6	Benign	Soft tissue	Metastasis	Yes	Distal femur	Positive	No	No
Female	14	21.8	Malignant	Bone	Primary	No	Distal femur	Negative	Yes	Yes
Male	28	20.1	Malignant	Soft tissue	Primary	No	Distal femur	Negative	Yes	Yes
Female	28	18.3	Benign	Soft tissue	Primary	No	Distal femur	Negative	No	No
Male	24	18.8	Malignant	Soft tissue	Primary	No	Proximal tibia	Positive	Yes	No
Female	24	16.2	Malignant	Bone	Primary	No	Distal femur	Negative	Yes	No
Male	33	14.9	Benign	Soft tissue	Primary	No	Distal femur	Negative	No	No
Male	43	16.4	Malignant	Soft tissue	Primary	No	Distal femur	Negative	Yes	Yes
Female	36	24.1	Benign	Soft tissue	Primary	No	Distal femur	Negative	No	No
Male	54	16.5	Malignant	Bone	Metastasis	No	Proximal tibia	Positive	Yes	Yes
Female	14	17.4	Benign	Soft tissue	Primary	No	Distal femur	Negative	No	No
Male	36	16.9	Benign	Soft tissue	Primary	No	Distal femur	Negative	No	No
Female	45	15.3	Benign	Soft tissue	Primary	No	Distal femur	Negative	No	No
Female	32	22.5	Malignant	Bone	Primary	No	Proximal tibia	Negative	Yes	Yes
Female	38	21.4	Malignant	Soft tissue	Primary	No	Distal femur	Negative	Yes	No
Male	57	25.8	Benign	Soft tissue	Metastasis	No	Distal femur	Negative	No	No
Female	23	15.1	Benign	Bone	Primary	No	Distal femur	Negative	No	No
Female	26	17.9	Benign	Soft tissue	Primary	No	Distal femur	Negative	No	No
Male	35	16.7	Malignant	Soft tissue	Primary	Yes	Proximal tibia	Negative	Yes	No
Male	21	15.3	Benign	Soft tissue	Primary	No	Distal femur	Negative	No	No
Male	18	17.2	Benign	Bone	Primary	No	Distal femur	Negative	No	No
Female	38	16.4	Benign	Soft tissue	Metastasis	No	Distal femur	Negative	No	No
Male	29	18.6	Benign	Bone	Primary	No	Distal femur	Negative	No	No
Male	27	19.3	Malignant	Soft tissue	Primary	No	Proximal tibia	Negative	Yes	Yes
Female	31	20.4	Malignant	Bone	Primary	No	Distal femur	Negative	Yes	Yes
Male	15	21.5	Benign	Soft tissue	Primary	No	Distal femur	Negative	No	No
Male	51	17.3	Malignant	Bone	Primary	No	Distal femur	Negative	Yes	Yes
Male	18	18.4	Benign	Soft tissue	Primary	No	Distal femur	Negative	No	No
Female	34	26.5	Malignant	Soft tissue	Primary	No	Proximal tibia	Positive	Yes	Yes
Female	26	15.3	Benign	Bone	Primary	No	Distal femur	Negative	No	No
Male	43	16.4	Malignant	Soft tissue	Metastasis	No	Distal femur	Negative	Yes	Yes
Female	41	14.9	Benign	Soft tissue	Primary	No	Distal femur	Negative	No	No
Male	27	16.8	Benign	Bone	Primary	No	Proximal tibia	Negative	No	No
Female	18	18.7	Malignant	Soft tissue	Primary	No	Distal femur	Negative	Yes	No
Female	18	20.4	Malignant	Soft tissue	Primary	No	Distal femur	Positive	Yes	No
Female	26	16.4	Benign	Soft tissue	Primary	No	Distal femur	Negative	No	No
Female	18	23.6	Malignant	Soft tissue	Primary	No	Proximal tibia	Negative	Yes	Yes
Male	27	16.4	Malignant	Soft tissue	Primary	No	Distal femur	Negative	Yes	Yes
Male	31	18.3	Benign	Soft tissue	Primary	No	Distal femur	Negative	No	No
Male	34	17.8	Malignant	Soft tissue	Metastasis	Yes	Distal femur	Negative	Yes	Yes
Female	48	16.4	Malignant	Soft tissue	Primary	No	Proximal tibia	Negative	Yes	No
Male	44	16.9	Benign	Bone	Primary	No	Distal femur	Positive	No	No
Male	24	25.6	Malignant	Soft tissue	Primary	No	Distal femur	Negative	Yes	Yes
Female	35	17.8	Malignant	Soft tissue	Primary	No	Distal femur	Negative	Yes	No
Male	36	16.9	Benign	Soft tissue	Primary	No	Distal femur	Negative	No	No
Male	31	21.5	Benign	Soft tissue	Primary	No	Proximal tibia	Negative	No	No
Female	28	21	Malignant	Soft tissue	Primary	No	Distal femur	Negative	Yes	No
Male	56	20.1	Benign	Soft tissue	Primary	No	Distal femur	Negative	No	No
Female	44	22.4	Malignant	Bone	Metastasis	No	Distal femur	Negative	Yes	Yes
Female	43	16.7	Malignant	Soft tissue	Primary	No	Proximal tibia	Negative	Yes	No
Male	37	18.6	Benign	Soft tissue	Primary	No	Distal femur	Negative	No	No
Female	49	15.8	Malignant	Bone	Primary	No	Distal femur	Negative	Yes	No
Male	41	19.5	Malignant	Soft tissue	Primary	No	Distal femur	Negative	Yes	Yes
Female	27	20.4	Benign	Soft tissue	Primary	No	Distal femur	Negative	No	No
Female	35	18.4	Malignant	Soft tissue	Primary	No	Proximal tibia	Negative	Yes	Yes
Female	36	25.9	Malignant	Soft tissue	Primary	No	Distal femur	Negative	Yes	Yes
Male	32	18.8	Benign	Soft tissue	Primary	No	Distal femur	Positive	No	No
Female	16	17.9	Malignant	Bone	Metastasis	No	Distal femur	Negative	Yes	No
Male	38	17.4	Malignant	Soft tissue	Primary	No	Distal femur	Negative	Yes	No
Male	24	16.7	Benign	Soft tissue	Primary	No	Distal femur	Negative	No	No
Female	16	16.8	Malignant	Soft tissue	Primary	Yes	Distal femur	Negative	Yes	No
Male	27	17.3	Malignant	Soft tissue	Primary	No	Proximal tibia	Negative	Yes	No
Male	31	17.4	Benign	Soft tissue	Primary	No	Distal femur	Negative	No	No
Male	17	18.6	Malignant	Soft tissue	Primary	No	Distal femur	Negative	Yes	No
Female	58	19.4	Malignant	Bone	Primary	No	Proximal tibia	Negative	Yes	No
Male	39	20.7	Benign	Soft tissue	Primary	No	Distal femur	Negative	No	No
Male	43	21.7	Malignant	Soft tissue	Metastasis	No	Total knee joint	Negative	Yes	Yes
Male	36	22.4	Malignant	Soft tissue	Primary	No	Distal femur	Negative	Yes	No
Female	27	26.4	Benign	Soft tissue	Primary	No	Distal femur	Negative	No	No
Female	21	17.7	Malignant	Soft tissue	Primary	No	Distal femur	Positive	Yes	Yes
Male	28	18.5	Benign	Soft tissue	Primary	No	Distal femur	Negative	No	No
Female	26	19.3	Malignant	Soft tissue	Primary	No	Distal femur	Negative	Yes	Yes
Female	28	20.3	Benign	Bone	Primary	No	Distal femur	Positive	No	No
Female	21	17.5	Malignant	Soft tissue	Primary	No	Distal femur	Negative	Yes	No
Male	17	16.3	Benign	Soft tissue	Primary	No	Distal femur	Negative	No	No
Female	29	21.3	Malignant	Soft tissue	Metastasis	No	Proximal tibia	Negative	Yes	No
Female	55	16.4	Benign	Soft tissue	Primary	No	Distal femur	Positive	No	No
Female	26	18	Malignant	Soft tissue	Primary	No	Distal femur	Negative	Yes	Yes
Male	54	17.6	Benign	Bone	Primary	Yes	Distal femur	Positive	No	No
Male	18	19.2	Malignant	Soft tissue	Primary	No	Distal femur	Negative	Yes	No
Female	25	21.4	Benign	Soft tissue	Primary	No	Proximal tibia	Negative	No	No
Male	27	23.1	Malignant	Soft tissue	Primary	Yes	Distal femur	Negative	Yes	No
Male	43	25.2	Benign	Bone	Primary	No	Proximal tibia	Negative	No	No
Male	28	17.2	Benign	Soft tissue	Primary	No	Distal femur	Negative	No	No
Female	45	18.2	Malignant	Bone	Metastasis	No	Distal femur	Negative	Yes	No
Male	52	16.4	Malignant	Soft tissue	Primary	No	Proximal tibia	Negative	Yes	No
Male	14	15.8	Benign	Soft tissue	Primary	No	Distal femur	Negative	No	No
Male	16	17.5	Malignant	Bone	Primary	No	Distal femur	Negative	Yes	Yes
Female	15	16.9	Malignant	Soft tissue	Primary	No	Distal femur	Positive	Yes	No
Female	25	19.6	Malignant	Soft tissue	Primary	No	Distal femur	Negative	Yes	No
Male	56	20.1	Benign	Soft tissue	Metastasis	No	Total knee joint	Negative	No	No
Female	31	21.8	Malignant	Soft tissue	Primary	No	Distal femur	Negative	Yes	Yes
Female	27	16.4	Malignant	Bone	Primary	No	Proximal tibia	Negative	Yes	No
Female	45	16.8	Malignant	Soft tissue	Primary	Yes	Distal femur	Positive	Yes	No
Female	52	18.7	Benign	Soft tissue	Primary	No	Distal femur	Negative	No	No
Female	14	18.3	Malignant	Soft tissue	Primary	No	Distal femur	Negative	Yes	Yes
Male	56	18.4	Malignant	Bone	Primary	No	Proximal tibia	Negative	Yes	Yes
Female	42	18.2	Benign	Soft tissue	Primary	No	Distal femur	Positive	No	No
Male	16	17.5	Malignant	Soft tissue	Primary	No	Distal femur	Negative	Yes	No
Male	26	17.9	Malignant	Soft tissue	Metastasis	No	Proximal tibia	Negative	Yes	No
Male	38	21.3	Benign	Soft tissue	Primary	No	Proximal tibia	Negative	No	No
Female	26	17.1	Malignant	Soft tissue	Primary	No	Distal femur	Negative	Yes	Yes
Male	19	16.7	Malignant	Bone	Primary	Yes	Distal femur	Positive	Yes	No
Male	27	16.3	Benign	Soft tissue	Primary	No	Distal femur	Negative	No	No
Female	35	20.4	Malignant	Soft tissue	Primary	No	Distal femur	Negative	Yes	No
Male	27	21.6	Malignant	Soft tissue	Primary	Yes	Distal femur	Negative	Yes	No
Female	13	25.7	Benign	Bone	Primary	No	Distal femur	Negative	No	No
Male	8	16.4	Malignant	Soft tissue	Primary	No	Distal femur	Positive	Yes	No
Female	56	16.2	Malignant	Soft tissue	Metastasis	No	Distal femur	Negative	Yes	Yes
Female	43	19.7	Malignant	Soft tissue	Primary	No	Distal femur	Negative	Yes	No
Female	26	18.3	Benign	Bone	Primary	No	Distal femur	Negative	No	No
Male	22	16.9	Malignant	Soft tissue	Primary	No	Proximal tibia	Negative	Yes	No
Female	35	18.6	Malignant	Soft tissue	Primary	No	Total knee joint	Positive	Yes	Yes
Female	26	17.5	Benign	Soft tissue	Primary	No	Distal femur	Negative	No	No
Male	31	18.4	Malignant	Soft tissue	Primary	No	Distal femur	Negative	Yes	No
Female	25	23.6	Malignant	Soft tissue	Primary	No	Distal femur	Negative	Yes	No
Female	16	26.1	Malignant	Bone	Primary	No	Proximal tibia	Negative	Yes	No
Female	46	15.9	Benign	Soft tissue	Metastasis	No	Proximal tibia	Positive	No	No
Male	43	16.7	Malignant	Soft tissue	Primary	No	Distal femur	Negative	Yes	No
Male	26	16.3	Malignant	Soft tissue	Primary	No	Distal femur	Negative	Yes	No
Female	27	17.4	Benign	Soft tissue	Primary	Yes	Distal femur	Negative	No	No
Male	21	16.7	Malignant	Bone	Primary	No	Proximal tibia	Negative	Yes	No
Female	36	16.9	Malignant	Soft tissue	Primary	No	Distal femur	Positive	Yes	Yes
Male	47	17.3	Benign	Soft tissue	Metastasis	Yes	Distal femur	Negative	No	No
Male	53	17.9	Malignant	Soft tissue	Primary	No	Distal femur	Negative	No	No
Female	24	16.5	Malignant	Bone	Primary	No	Distal femur	Positive	Yes	No
Male	43	16.5	Benign	Soft tissue	Primary	No	Distal femur	Negative	No	No
Male	24	20.1	Malignant	Soft tissue	Primary	No	Distal femur	Positive	Yes	No
Female	13	21.7	Benign	Soft tissue	Primary	No	Proximal tibia	Negative	No	No
Female	46	17.4	Benign	Bone	Metastasis	No	Distal femur	Negative	No	No
Female	23	16.8	Benign	Soft tissue	Primary	No	Distal femur	Negative	No	No
Male	45	18.8	Malignant	Soft tissue	Primary	No	Distal femur	Negative	Yes	Yes
Female	53	17.4	Malignant	Soft tissue	Primary	Yes	Distal femur	Positive	Yes	No
Female	35	19.5	Malignant	Bone	Primary	No	Distal femur	Negative	Yes	No
Male	38	16.7	Benign	Soft tissue	Primary	No	Proximal tibia	Negative	No	No
Female	29	22.6	Malignant	Soft tissue	Metastasis	No	Distal femur	Negative	Yes	Yes
Female	18	18.8	Malignant	Soft tissue	Primary	No	Proximal tibia	Positive	Yes	Yes
Male	57	21	Malignant	Bone	Primary	No	Distal femur	Negative	Yes	No
Female	32	19.5	Benign	Soft tissue	Primary	No	Distal femur	Negative	No	No
Female	38	20.4	Malignant	Soft tissue	Primary	No	Total knee joint	Negative	Yes	No
Female	28	25.8	Benign	Soft tissue	Primary	No	Distal femur	Positive	No	No
Female	19	18.9	Malignant	Soft tissue	Primary	No	Distal femur	Negative	Yes	Yes
Male	26	20.1	Malignant	Bone	Primary	No	Distal femur	Negative	Yes	No
Female	27	17.5	Benign	Soft tissue	Primary	No	Distal femur	Negative	No	No
Female	16	18.2	Malignant	Soft tissue	Metastasis	Yes	Distal femur	Negative	Yes	No
Male	32	16.7	Malignant	Bone	Primary	No	Proximal tibia	Positive	Yes	No
Female	34	17	Malignant	Soft tissue	Primary	No	Distal femur	Negative	Yes	No
Female	32	21.2	Benign	Bone	Primary	No	Distal femur	Negative	No	No
Female	17	17.2	Malignant	Bone	Primary	No	Proximal tibia	Positive	Yes	No
Female	27	16	Malignant	Soft tissue	Primary	No	Distal femur	Negative	Yes	No
Female	32	15.6	Benign	Soft tissue	Metastasis	Yes	Distal femur	Negative	No	No
Female	47	16.2	Malignant	Soft tissue	Primary	No	Distal femur	Negative	Yes	Yes
Male	54	16.2	Malignant	Bone	Primary	No	Distal femur	Negative	Yes	Yes
Female	58	17.8	Benign	Soft tissue	Primary	No	Proximal tibia	Positive	No	No
Female	43	16.9	Malignant	Soft tissue	Primary	No	Proximal tibia	Negative	Yes	No
Female	21	17.2	Benign	Bone	Primary	No	Distal femur	Positive	No	No
Female	56	18.3	Malignant	Soft tissue	Primary	No	Distal femur	Positive	Yes	Yes
Female	17	17.3	Malignant	Soft tissue	Primary	No	Distal femur	Negative	Yes	No
Female	26	15.9	Benign	Soft tissue	Primary	No	Proximal tibia	Negative	No	No
Male	24	18.8	Malignant	Soft tissue	Metastasis	No	Distal femur	Negative	Yes	No
Female	27	19.3	Benign	Soft tissue	Primary	No	Distal femur	Negative	No	No
Female	35	16.7	Malignant	Soft tissue	Primary	No	Distal femur	Negative	Yes	No
Female	52	21.7	Malignant	Soft tissue	Metastasis	Yes	Distal femur	Negative	Yes	Yes
Female	61	18.3	Benign	Bone	Primary	No	Proximal tibia	Negative	No	No
Female	64	19.6	Malignant	Soft tissue	Primary	No	Distal femur	Negative	Yes	Yes
Male	62	15.7	Benign	Soft tissue	Metastasis	No	Distal femur	Negative	No	No
Female	64	16.2	Malignant	Soft tissue	Primary	No	Distal femur	Negative	Yes	No
Female	72	18.4	Malignant	Soft tissue	Primary	No	Distal femur	Negative	Yes	No
Male	64	25.6	Malignant	Bone	Primary	Yes	Proximal tibia	Negative	Yes	Yes
Male	63	15.3	Benign	Soft tissue	Primary	No	Distal femur	Positive	No	No
Male	66	17.5	Malignant	Soft tissue	Primary	No	Distal femur	Negative	Yes	No
Female	61	18.3	Benign	Soft tissue	Metastasis	No	Distal femur	Negative	No	No
Male	67	21.6	Malignant	Soft tissue	Primary	No	Proximal tibia	Negative	Yes	Yes
Male	63	21.9	Benign	Bone	Primary	No	Distal femur	Positive	No	No
Female	66	22.1	Malignant	Soft tissue	Primary	No	Distal femur	Negative	Yes	No
Female	66	17.5	Malignant	Bone	Primary	No	Distal femur	Negative	Yes	No
Male	60	23.6	Benign	Soft tissue	Primary	No	Distal femur	Negative	No	No
Male	65	22.5	Malignant	Bone	Metastasis	No	Distal femur	Negative	Yes	Yes
Female	72	16.4	Malignant	Soft tissue	Primary	No	Proximal tibia	Negative	Yes	No
Female	70	16.8	Malignant	Bone	Primary	No	Distal femur	Negative	Yes	Yes
Female	62	17.3	Malignant	Bone	Primary	Yes	Distal femur	Positive	Yes	Yes
Male	66	18.8	Benign	Soft tissue	Primary	No	Proximal tibia	Negative	No	No
Female	61	16.7	Malignant	Soft tissue	Primary	No	Distal femur	Positive	Yes	Yes
Female	71	15.8	Malignant	Bone	Primary	Yes	Distal femur	Negative	Yes	No
Male	65	18.9	Malignant	Soft tissue	Primary	No	Distal femur	Negative	Yes	No
Female	66	16.7	Benign	Soft tissue	Primary	No	Proximal tibia	Negative	No	No
Female	67	17.3	Malignant	Soft tissue	Metastasis	No	Distal femur	Positive	Yes	Yes
Female	78	17.2	Benign	Soft tissue	Primary	No	Distal femur	Negative	No	No
Male	72	16.8	Benign	Soft tissue	Primary	No	Distal femur	Negative	No	No
Male	71	18.5	Benign	Bone	Metastasis	No	Distal femur	Negative	No	No
Male	64	18.2	Benign	Soft tissue	Primary	No	Proximal tibia	Negative	No	No
Female	67	21.3	Benign	Soft tissue	Primary	No	Distal femur	Positive	No	No
Male	77	15.8	Benign	Soft tissue	Metastasis	No	Distal femur	Negative	No	No
Female	66	20.1	Benign	Soft tissue	Primary	No	Distal femur	Negative	No	No
Male	62	16.2	Malignant	Soft tissue	Primary	No	Distal femur	Negative	Yes	Yes
Male	62	22.8	Benign	Bone	Primary	Yes	Distal femur	Positive	No	No
Female	74	21.7	Malignant	Soft tissue	Primary	No	Proximal tibia	Negative	Yes	No
Male	63	22.9	Malignant	Soft tissue	Primary	No	Distal femur	Negative	Yes	No
Female	66	16.2	Benign	Bone	Metastasis	No	Distal femur	Positive	No	No
Female	63	24.7	Benign	Soft tissue	Primary	No	Distal femur	Negative	No	No
Male	67	16.9	Benign	Soft tissue	Primary	No	Distal femur	Negative	No	No
Female	62	16.8	Malignant	Bone	Primary	Yes	Proximal tibia	Negative	Yes	Yes
Male	60	24.8	Malignant	Soft tissue	Primary	No	Distal femur	Positive	Yes	No
Male	63	18.8	Benign	Soft tissue	Primary	No	Distal femur	Negative	No	No
Male	62	18.3	Malignant	Soft tissue	Metastasis	No	Distal femur	Negative	Yes	Yes
Female	67	18.9	Benign	Soft tissue	Primary	No	Proximal tibia	Negative	No	No
Male	72	17.3	Malignant	Soft tissue	Primary	No	Distal femur	Positive	Yes	No
Male	67	24.6	Malignant	Bone	Primary	No	Distal femur	Negative	Yes	Yes
Female	66	19.8	Benign	Soft tissue	Primary	No	Distal femur	Negative	No	No
Male	62	20.1	Malignant	Soft tissue	Primary	No	Proximal tibia	Positive	Yes	Yes
Male	64	15.8	Malignant	Soft tissue	Primary	No	Distal femur	Negative	Yes	No
Male	66	19.3	Malignant	Bone	Metastasis	No	Distal femur	Negative	Yes	Yes
Female	64	16.8	Benign	Soft tissue	Primary	No	Distal femur	Negative	No	No
Female	62	24.7	Benign	Soft tissue	Primary	Yes	Proximal tibia	Positive	No	No
Male	66	19.7	Malignant	Soft tissue	Primary	No	Distal femur	Negative	Yes	Yes
Female	72	17.6	Malignant	Bone	Primary	No	Distal femur	Negative	Yes	No
